# Supplementary material for: Spatiotemporal Characteristics of Droughts and Their Propagation during the Past 67 Years in Northern Thailand
Source: MDPI journal article supplement (doi:10.3390/atmos13020277), 2022-02-07
Supplement: s1 [file s1]

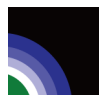

# Supplementary Materials: Spatiotemporal Characteristics of Droughts and Their Propagation during the Past 67 Years in Northern Thailand

Baoxu Zhao <sup>1</sup>, Dawen Yang <sup>1,\*</sup>, Shuyu Yang <sup>1</sup> and Jerasorn Santisirisomboon <sup>2</sup>

<sup>1</sup> State Key Laboratory of Hydrosience and Engineering, Department of Hydraulic Engineering, Tsinghua University, Beijing 100084, China; zbx18@mails.tsinghua.edu.cn (B.Z.);

yangsy17@mails.tsinghua.edu.cn (S.Y.)

<sup>2</sup> Division of Energy Engineering, Faculty of engineering, Ramkhamhaeng University, Bangkok 10240, Thailand; jerasorn@raml.ru.ac.th

\* **Correspondence:** yangdw@tsinghua.edu.cn

**Table S1.** the drought propagation ratios in the study period. (The first row is the result calculated from the original formula of drought propagation ratios in Apurv et al. (2017); the second row is the result calculated from the formula herein proposed by the authors)

| Propagation Ratio | Duration | Area | Severity |
|-------------------|----------|------|----------|
| Original Formula  | 1.00     | 1.02 | 1.06     |
| New Formula       | 0.94     | 0.83 | 0.92     |

**Table S2.** The historical meteorological droughts in the study period. (MNo refers to the code of meteorological droughts.T refers to return period and the unit is year.)

| MNo | T <sub>Duration</sub> | T <sub>Area</sub> | T <sub>Severity</sub> | T <sub>A-S</sub> | T <sub>S-D</sub> | T <sub>D-A</sub> | T <sub>D-A-S</sub> | Duration<br>(month) | Area<br>(km <sup>2</sup> ) | Severity<br>(km <sup>2</sup> month) | Begin              | Finish         |
|-----|-----------------------|-------------------|-----------------------|------------------|------------------|------------------|--------------------|---------------------|----------------------------|-------------------------------------|--------------------|----------------|
| 1   | 8                     | 4                 | 3                     | 8                | 8                | 4                | 9                  | 6                   | 2.00×10 <sup>5</sup>       | 9.15×10 <sup>6</sup>                | Januray<br>1948    | June 1948      |
| 2   | 51                    | 47                | 72                    | 51               | 72               | 72               | 112                | 9                   | 3.66×10 <sup>5</sup>       | 4.98×10 <sup>7</sup>                | October<br>1948    | June 1949      |
| 3   | 10                    | 38                | 43                    | 38               | 43               | 43               | 75                 | 6                   | 3.61×10 <sup>5</sup>       | 3.98×10 <sup>7</sup>                | Decembe<br>r 1949  | May 1950       |
| 4   | 3                     | 17                | 14                    | 17               | 14               | 17               | 28                 | 5                   | 3.26×10 <sup>5</sup>       | 2.32×10 <sup>7</sup>                | Decembe<br>r 1950  | April 1951     |
| 5   | 1                     | 1                 | 1                     | 1                | 1                | 1                | 1                  | 3                   | 3.38×10 <sup>4</sup>       | 1.99×10 <sup>6</sup>                | Januray<br>1951    | March 1951     |
| 6   | 8                     | 3                 | 4                     | 8                | 8                | 4                | 9                  | 6                   | 1.53×10 <sup>5</sup>       | 1.09×10 <sup>7</sup>                | Decembe<br>r 1951  | May 1952       |
| 7   | 1                     | 1                 | 1                     | 1                | 1                | 1                | 2                  | 3                   | 6.56×10 <sup>4</sup>       | 3.01×10 <sup>6</sup>                | July 1953          | September 1953 |
| 8   | 3                     | 2                 | 3                     | 3                | 3                | 3                | 4                  | 5                   | 1.08×10 <sup>5</sup>       | 7.78×10 <sup>6</sup>                | Febrary<br>1954    | June 1954      |
| 9   | 6                     | 7                 | 8                     | 7                | 8                | 8                | 9                  | 6                   | 2.49×10 <sup>5</sup>       | 1.67×10 <sup>7</sup>                | August<br>1954     | Janurary 1955  |
| 10  | 2                     | 2                 | 2                     | 2                | 2                | 2                | 2                  | 4                   | 1.13×10 <sup>5</sup>       | 5.53×10 <sup>6</sup>                | July 1955          | October 1955   |
| 11  | 1                     | 1                 | 1                     | 1                | 1                | 1                | 1                  | 3                   | 2.75×10 <sup>4</sup>       | 1.17×10 <sup>6</sup>                | Septemb<br>er 1955 | November 1955  |
| 12  | 2                     | 3                 | 2                     | 3                | 2                | 3                | 3                  | 4                   | 1.50×10 <sup>5</sup>       | 6.04×10 <sup>6</sup>                | August<br>1958     | November 1958  |
| 13  | 1                     | 1                 | 1                     | 1                | 1                | 1                | 1                  | 3                   | 5.44×10 <sup>4</sup>       | 2.18×10 <sup>6</sup>                | April<br>1959      | June 1959      |
| 14  | 1                     | 1                 | 1                     | 1                | 1                | 1                | 1                  | 3                   | 3.56×10 <sup>4</sup>       | 1.45×10 <sup>6</sup>                | Febrary<br>1960    | April 1960     |

|    |    |     |    |     |    |     |     |    |                    |                    |                    |                |
|----|----|-----|----|-----|----|-----|-----|----|--------------------|--------------------|--------------------|----------------|
| 15 | 2  | 1   | 1  | 2   | 2  | 1   | 2   | 4  | $5.19 \times 10^4$ | $2.65 \times 10^6$ | March 1960         | June 1960      |
| 16 | 1  | 1   | 1  | 1   | 1  | 1   | 1   | 3  | $1.88 \times 10^4$ | $9.72 \times 10^5$ | March 1963         | May 1963       |
| 17 | 1  | 1   | 1  | 1   | 1  | 1   | 1   | 3  | $3.81 \times 10^4$ | $1.91 \times 10^6$ | March 1963         | May 1963       |
| 18 | 1  | 1   | 1  | 1   | 1  | 1   | 1   | 3  | $3.88 \times 10^4$ | $2.06 \times 10^6$ | July 1965          | September 1965 |
| 19 | 1  | 2   | 2  | 2   | 2  | 2   | 2   | 3  | $9.94 \times 10^4$ | $4.13 \times 10^6$ | Januray 1967       | March 1967     |
| 20 | 6  | 2   | 2  | 6   | 6  | 2   | 7   | 6  | $1.13 \times 10^5$ | $6.33 \times 10^6$ | August 1967        | Januray 1968   |
| 21 | 2  | 4   | 3  | 4   | 3  | 4   | 4   | 4  | $1.79 \times 10^5$ | $9.36 \times 10^6$ | July 1968          | October 1968   |
| 22 | 2  | 2   | 1  | 2   | 2  | 2   | 2   | 3  | $7.63 \times 10^4$ | $2.78 \times 10^6$ | Decembe<br>r 1969  | Febrary 1970   |
| 23 | 2  | 5   | 3  | 5   | 3  | 5   | 6   | 4  | $2.09 \times 10^5$ | $8.80 \times 10^6$ | Septemb<br>er 1971 | December 1971  |
| 24 | 4  | 4   | 5  | 4   | 5  | 5   | 5   | 5  | $1.84 \times 10^5$ | $1.32 \times 10^7$ | Decembe<br>r 1972  | April 1973     |
| 25 | 2  | 13  | 4  | 13  | 4  | 13  | 16  | 3  | $3.08 \times 10^5$ | $1.04 \times 10^7$ | October 1973       | December 1973  |
| 26 | 1  | 2   | 1  | 2   | 1  | 2   | 2   | 3  | $9.31 \times 10^4$ | $3.23 \times 10^6$ | May 1974           | July 1974      |
| 27 | 15 | 6   | 12 | 15  | 15 | 12  | 19  | 7  | $2.39 \times 10^5$ | $2.20 \times 10^7$ | Decembe<br>r 1976  | June 1977      |
| 28 | 4  | 1   | 1  | 4   | 4  | 1   | 5   | 5  | $5.38 \times 10^4$ | $2.94 \times 10^6$ | May 1977           | September 1977 |
| 29 | 1  | 1   | 1  | 1   | 1  | 1   | 1   | 3  | $3.19 \times 10^4$ | $1.53 \times 10^6$ | August 1977        | October 1977   |
| 30 | 2  | 2   | 2  | 2   | 2  | 2   | 2   | 3  | $8.88 \times 10^4$ | $3.40 \times 10^6$ | Januray 1979       | March 1979     |
| 31 | 76 | 133 | 58 | 133 | 76 | 133 | 157 | 10 | $3.76 \times 10^5$ | $4.56 \times 10^7$ | June 1979          | March 1980     |
| 32 | 1  | 2   | 2  | 2   | 2  | 2   | 2   | 3  | $8.94 \times 10^4$ | $3.45 \times 10^6$ | July 1981          | September 1981 |

|    |    |    |    |    |    |    |    |   |                    |                    |                   |                |
|----|----|----|----|----|----|----|----|---|--------------------|--------------------|-------------------|----------------|
| 33 | 4  | 7  | 5  | 7  | 5  | 7  | 7  | 5 | $2.45 \times 10^5$ | $1.17 \times 10^7$ | Januray 1983      | May 1983       |
| 34 | 3  | 1  | 1  | 3  | 3  | 1  | 3  | 4 | $3.50 \times 10^4$ | $2.10 \times 10^6$ | March 1983        | June 1983      |
| 35 | 1  | 1  | 1  | 1  | 1  | 1  | 1  | 3 | $6.06 \times 10^4$ | $3.11 \times 10^6$ | Decembe<br>r 1985 | Febrary 1986   |
| 36 | 3  | 4  | 3  | 4  | 3  | 4  | 4  | 4 | $1.79 \times 10^5$ | $7.69 \times 10^6$ | Decembe<br>r 1985 | March 1986     |
| 37 | 1  | 1  | 1  | 1  | 1  | 1  | 1  | 3 | $5.88 \times 10^4$ | $2.56 \times 10^6$ | June 1986         | August 1986    |
| 38 | 1  | 2  | 2  | 2  | 2  | 2  | 3  | 3 | $1.24 \times 10^5$ | $4.32 \times 10^6$ | July 1986         | September 1986 |
| 39 | 1  | 1  | 1  | 1  | 1  | 1  | 1  | 3 | $6.88 \times 10^4$ | $2.12 \times 10^6$ | May 1987          | July 1987      |
| 40 | 2  | 1  | 1  | 2  | 2  | 1  | 2  | 3 | $5.81 \times 10^4$ | $1.92 \times 10^6$ | June 1989         | August 1989    |
| 41 | 1  | 1  | 1  | 1  | 1  | 1  | 1  | 3 | $3.25 \times 10^4$ | $1.50 \times 10^6$ | May 1990          | July 1990      |
| 42 | 2  | 16 | 14 | 16 | 14 | 16 | 26 | 4 | $3.24 \times 10^5$ | $2.38 \times 10^7$ | Febrary 1992      | May 1992       |
| 43 | 1  | 2  | 1  | 2  | 1  | 2  | 2  | 3 | $8.69 \times 10^4$ | $3.28 \times 10^6$ | April 1993        | June 1993      |
| 44 | 6  | 1  | 2  | 6  | 6  | 2  | 7  | 6 | $6.88 \times 10^4$ | $3.74 \times 10^6$ | May 1993          | October 1993   |
| 45 | 3  | 3  | 3  | 3  | 3  | 3  | 3  | 5 | $1.64 \times 10^5$ | $8.64 \times 10^6$ | August 1993       | December 1993  |
| 46 | 9  | 5  | 5  | 9  | 9  | 5  | 13 | 6 | $2.24 \times 10^5$ | $1.22 \times 10^7$ | April 1997        | September 1997 |
| 47 | 2  | 1  | 1  | 2  | 2  | 1  | 2  | 3 | $2.88 \times 10^4$ | $1.37 \times 10^6$ | Febrary 1998      | April 1998     |
| 48 | 58 | 2  | 3  | 59 | 59 | 3  | 67 | 9 | $7.25 \times 10^4$ | $7.71 \times 10^6$ | Febrary 1998      | October 1998   |
| 49 | 3  | 2  | 2  | 3  | 3  | 2  | 6  | 4 | $9.38 \times 10^4$ | $5.76 \times 10^6$ | May 1998          | August 1998    |
| 50 | 1  | 1  | 1  | 1  | 1  | 1  | 1  | 3 | $3.50 \times 10^4$ | $1.41 \times 10^6$ | July 2000         | September 2000 |
| 51 | 1  | 1  | 1  | 2  | 2  | 1  | 2  | 3 | $5.75 \times 10^4$ | $1.88 \times 10^6$ | June 2001         | August 2001    |

|    |    |    |    |    |    |    |    |   |                    |                    |                |                |
|----|----|----|----|----|----|----|----|---|--------------------|--------------------|----------------|----------------|
| 52 | 12 | 3  | 6  | 14 | 15 | 6  | 16 | 7 | $1.43 \times 10^5$ | $1.43 \times 10^7$ | August 2003    | February 2004  |
| 53 | 1  | 2  | 1  | 3  | 2  | 2  | 4  | 3 | $1.18 \times 10^5$ | $3.33 \times 10^6$ | September 2003 | November 2003  |
| 54 | 6  | 2  | 2  | 7  | 7  | 2  | 8  | 6 | $7.38 \times 10^4$ | $4.87 \times 10^6$ | October 2003   | March 2004     |
| 55 | 7  | 32 | 22 | 37 | 24 | 33 | 66 | 6 | $3.56 \times 10^5$ | $2.92 \times 10^7$ | July 2004      | December 2004  |
| 56 | 8  | 15 | 15 | 21 | 19 | 18 | 42 | 6 | $3.18 \times 10^5$ | $2.46 \times 10^7$ | September 2006 | February 2007  |
| 57 | 2  | 1  | 1  | 2  | 2  | 1  | 2  | 4 | $4.50 \times 10^4$ | $2.17 \times 10^6$ | June 2007      | September 2007 |
| 58 | 1  | 1  | 1  | 1  | 1  | 1  | 2  | 3 | $2.75 \times 10^4$ | $1.35 \times 10^6$ | July 2007      | September 2007 |
| 59 | 3  | 6  | 5  | 8  | 6  | 6  | 9  | 4 | $2.37 \times 10^5$ | $1.18 \times 10^7$ | October 2007   | January 2008   |
| 60 | 1  | 2  | 2  | 2  | 2  | 2  | 3  | 3 | $1.12 \times 10^5$ | $5.33 \times 10^6$ | November 2008  | January 2009   |
| 61 | 2  | 2  | 3  | 3  | 4  | 3  | 7  | 4 | $1.20 \times 10^5$ | $8.62 \times 10^6$ | November 2008  | February 2009  |
| 62 | 3  | 2  | 2  | 4  | 3  | 2  | 6  | 4 | $1.17 \times 10^5$ | $5.54 \times 10^6$ | November 2008  | February 2009  |
| 63 | 1  | 2  | 1  | 2  | 1  | 2  | 2  | 3 | $7.38 \times 10^4$ | $2.09 \times 10^6$ | August 2009    | October 2009   |
| 64 | 3  | 9  | 13 | 11 | 13 | 13 | 15 | 5 | $2.80 \times 10^5$ | $2.22 \times 10^7$ | January 2010   | May 2010       |
| 65 | 2  | 2  | 3  | 3  | 3  | 3  | 6  | 4 | $1.06 \times 10^5$ | $7.10 \times 10^6$ | February 2010  | May 2010       |
| 66 | 1  | 1  | 1  | 1  | 1  | 2  | 2  | 3 | $6.81 \times 10^4$ | $2.75 \times 10^6$ | January 2011   | March 2011     |
| 67 | 2  | 3  | 3  | 4  | 4  | 4  | 6  | 4 | $1.58 \times 10^5$ | $9.28 \times 10^6$ | January 2013   | April 2013     |

|           |   |   |   |   |   |   |   |   |                    |                    |                  |            |
|-----------|---|---|---|---|---|---|---|---|--------------------|--------------------|------------------|------------|
| <b>68</b> | 1 | 1 | 1 | 2 | 2 | 1 | 2 | 3 | $6.56 \times 10^4$ | $2.63 \times 10^6$ | February<br>2013 | April 2013 |
| <b>69</b> | 2 | 3 | 4 | 4 | 5 | 5 | 7 | 4 | $1.57 \times 10^5$ | $1.14 \times 10^7$ | February<br>2013 | May 2013   |
| <b>70</b> | 2 | 2 | 2 | 2 | 2 | 2 | 3 | 4 | $8.00 \times 10^4$ | $4.68 \times 10^6$ | Januray<br>2014  | April 2014 |

**Table S3.** The historical soil droughts in the study period. (MNo refers to the code of meteorological droughts.T refers to return period and the unit is year.)

| SNo | T <sub>Duration</sub> | T <sub>Area</sub> | T <sub>Severity</sub> | T <sub>A-S</sub> | T <sub>S-D</sub> | T <sub>D-A</sub> | T <sub>D-A-S</sub> | Duration<br>(month) | Area<br>(km <sup>2</sup> ) | Severity<br>(km <sup>2</sup> month<br>) | Begin             | Finish           |
|-----|-----------------------|-------------------|-----------------------|------------------|------------------|------------------|--------------------|---------------------|----------------------------|-----------------------------------------|-------------------|------------------|
| 1   | 21                    | 10                | 7                     | 21               | 21               | 10               | 27                 | 7                   | 2.23×10 <sup>5</sup>       | 1.07×10 <sup>7</sup>                    | Januray<br>1949   | July<br>1949     |
| 2   | 2                     | 4                 | 4                     | 4                | 4                | 4                | 5                  | 3                   | 1.31×10 <sup>5</sup>       | 7.50×10 <sup>6</sup>                    | March<br>1950     | May<br>1950      |
| 3   | 10                    | 19                | 23                    | 19               | 23               | 23               | 29                 | 6                   | 2.79×10 <sup>5</sup>       | 2.33×10 <sup>7</sup>                    | Decemb<br>er 1954 | May<br>1955      |
| 4   | 2                     | 2                 | 2                     | 2                | 2                | 2                | 2                  | 3                   | 6.06×10 <sup>4</sup>       | 3.85×10 <sup>6</sup>                    | Decemb<br>er 1956 | February<br>1957 |
| 5   | 2                     | 3                 | 3                     | 3                | 3                | 3                | 3                  | 3                   | 1.01×10 <sup>5</sup>       | 5.40×10 <sup>6</sup>                    | Decemb<br>er 1956 | February<br>1957 |
| 6   | 3                     | 2                 | 2                     | 3                | 3                | 2                | 3                  | 4                   | 4.88×10 <sup>4</sup>       | 2.74×10 <sup>6</sup>                    | March<br>1958     | June<br>1958     |
| 7   | 4                     | 4                 | 3                     | 4                | 4                | 4                | 5                  | 4                   | 1.17×10 <sup>5</sup>       | 5.38×10 <sup>6</sup>                    | Decemb<br>er 1958 | March<br>1959    |
| 8   | 9                     | 9                 | 10                    | 9                | 10               | 10               | 12                 | 5                   | 2.12×10 <sup>5</sup>       | 1.42×10 <sup>7</sup>                    | February<br>1960  | June<br>1960     |
| 9   | 4                     | 2                 | 2                     | 4                | 4                | 2                | 4                  | 4                   | 7.13×10 <sup>4</sup>       | 3.02×10 <sup>6</sup>                    | April<br>1963     | July<br>1963     |
| 10  | 2                     | 2                 | 2                     | 2                | 2                | 2                | 2                  | 3                   | 4.81×10 <sup>4</sup>       | 1.63×10 <sup>6</sup>                    | February<br>1967  | April<br>1967    |
| 11  | 2                     | 2                 | 2                     | 2                | 2                | 2                | 2                  | 3                   | 6.94×10 <sup>4</sup>       | 2.48×10 <sup>6</sup>                    | Januray<br>1968   | March<br>1968    |
| 12  | 6                     | 2                 | 2                     | 6                | 6                | 2                | 6                  | 5                   | 5.75×10 <sup>4</sup>       | 3.08×10 <sup>6</sup>                    | Decemb<br>er 1968 | April<br>1969    |

|           |    |     |     |     |     |     |     |   |                    |                    |               |            |
|-----------|----|-----|-----|-----|-----|-----|-----|---|--------------------|--------------------|---------------|------------|
| <b>13</b> | 2  | 2   | 2   | 2   | 2   | 2   | 2   | 3 | $4.13 \times 10^4$ | $2.20 \times 10^6$ | March 1969    | May 1969   |
| <b>14</b> | 2  | 3   | 3   | 3   | 3   | 3   | 4   | 3 | $1.07 \times 10^5$ | $5.50 \times 10^6$ | March 1973    | May 1973   |
| <b>15</b> | 4  | 2   | 2   | 4   | 4   | 2   | 4   | 4 | $6.63 \times 10^4$ | $3.59 \times 10^6$ | March 1977    | June 1977  |
| <b>16</b> | 3  | 2   | 2   | 3   | 3   | 2   | 3   | 4 | $5.00 \times 10^4$ | $2.86 \times 10^6$ | December 1978 | March 1979 |
| <b>17</b> | 6  | 14  | 12  | 14  | 12  | 14  | 17  | 5 | $2.53 \times 10^5$ | $1.59 \times 10^7$ | January 1979  | May 1979   |
| <b>18</b> | 97 | 129 | 135 | 129 | 135 | 136 | 179 | 8 | $3.70 \times 10^5$ | $5.68 \times 10^7$ | November 1979 | June 1980  |
| <b>19</b> | 4  | 10  | 12  | 10  | 12  | 12  | 15  | 4 | $2.16 \times 10^5$ | $1.56 \times 10^7$ | March 1983    | June 1983  |
| <b>20</b> | 6  | 3   | 4   | 6   | 6   | 4   | 7   | 5 | $1.01 \times 10^5$ | $7.23 \times 10^6$ | March 1983    | July 1983  |
| <b>21</b> | 2  | 2   | 2   | 2   | 2   | 2   | 2   | 3 | $4.63 \times 10^4$ | $1.67 \times 10^6$ | February 1985 | April 1985 |
| <b>22</b> | 2  | 6   | 6   | 6   | 6   | 6   | 8   | 3 | $1.75 \times 10^5$ | $9.17 \times 10^6$ | March 1986    | May 1986   |
| <b>23</b> | 2  | 2   | 2   | 2   | 2   | 2   | 2   | 3 | $5.94 \times 10^4$ | $2.75 \times 10^6$ | March 1987    | May 1987   |
| <b>24</b> | 5  | 5   | 5   | 5   | 5   | 5   | 6   | 5 | $1.44 \times 10^5$ | $7.74 \times 10^6$ | February 1991 | June 1991  |
| <b>25</b> | 5  | 20  | 26  | 20  | 26  | 26  | 30  | 5 | $2.84 \times 10^5$ | $2.49 \times 10^7$ | March 1992    | July 1992  |
| <b>26</b> | 6  | 2   | 2   | 6   | 6   | 2   | 7   | 5 | $4.38 \times 10^4$ | $4.10 \times 10^6$ | March 1992    | July 1992  |

|           |    |     |    |     |    |     |     |   |                    |                    |               |                |
|-----------|----|-----|----|-----|----|-----|-----|---|--------------------|--------------------|---------------|----------------|
| <b>27</b> | 2  | 2   | 2  | 2   | 2  | 2   | 2   | 3 | $4.06 \times 10^4$ | $2.35 \times 10^6$ | November 1993 | January 1994   |
| <b>28</b> | 2  | 7   | 5  | 7   | 5  | 7   | 10  | 3 | $1.82 \times 10^5$ | $8.37 \times 10^6$ | December 1993 | February 1994  |
| <b>29</b> | 2  | 2   | 2  | 2   | 2  | 2   | 2   | 3 | $7.00 \times 10^4$ | $3.09 \times 10^6$ | December 1993 | February 1994  |
| <b>30</b> | 17 | 5   | 9  | 17  | 17 | 9   | 23  | 6 | $1.49 \times 10^5$ | $1.28 \times 10^7$ | December 1994 | May 1995       |
| <b>31</b> | 12 | 3   | 3  | 12  | 12 | 3   | 12  | 6 | $9.75 \times 10^4$ | $5.31 \times 10^6$ | December 1994 | May 1995       |
| <b>32</b> | 5  | 2   | 3  | 5   | 5  | 3   | 6   | 5 | $7.88 \times 10^4$ | $4.37 \times 10^6$ | May 1997      | September 1997 |
| <b>33</b> | 3  | 3   | 4  | 3   | 4  | 4   | 4   | 4 | $1.10 \times 10^5$ | $6.20 \times 10^6$ | March 1998    | June 1998      |
| <b>34</b> | 3  | 2   | 2  | 3   | 3  | 2   | 3   | 4 | $3.13 \times 10^4$ | $2.19 \times 10^6$ | November 1998 | February 1999  |
| <b>35</b> | 4  | 2   | 2  | 4   | 4  | 2   | 4   | 4 | $7.56 \times 10^4$ | $3.70 \times 10^6$ | February 2001 | May 2001       |
| <b>36</b> | 2  | 9   | 5  | 9   | 5  | 9   | 12  | 3 | $2.15 \times 10^5$ | $8.47 \times 10^6$ | March 2002    | May 2002       |
| <b>37</b> | 44 | 22  | 24 | 44  | 44 | 24  | 50  | 7 | $2.91 \times 10^5$ | $2.36 \times 10^7$ | November 2003 | May 2004       |
| <b>38</b> | 44 | 136 | 87 | 136 | 87 | 136 | 144 | 7 | $3.71 \times 10^5$ | $4.61 \times 10^7$ | November 2004 | May 2005       |

|           |   |   |   |   |   |   |   |   |                    |                    |               |            |
|-----------|---|---|---|---|---|---|---|---|--------------------|--------------------|---------------|------------|
| <b>39</b> | 6 | 5 | 6 | 6 | 6 | 6 | 8 | 5 | $1.53 \times 10^5$ | $9.37 \times 10^6$ | December 2006 | April 2007 |
| <b>40</b> | 3 | 3 | 3 | 3 | 3 | 3 | 3 | 4 | $1.11 \times 10^5$ | $5.19 \times 10^6$ | February 2007 | May 2007   |
| <b>41</b> | 2 | 3 | 3 | 3 | 3 | 3 | 4 | 3 | $1.08 \times 10^5$ | $5.56 \times 10^6$ | April 2010    | June 2010  |
| <b>42</b> | 3 | 2 | 3 | 3 | 3 | 3 | 4 | 4 | $6.25 \times 10^4$ | $4.30 \times 10^6$ | April 2010    | July 2010  |
| <b>43</b> | 2 | 3 | 3 | 3 | 3 | 3 | 3 | 3 | $9.13 \times 10^4$ | $4.60 \times 10^6$ | April 2013    | June 2013  |
| <b>44</b> | 2 | 4 | 3 | 4 | 3 | 4 | 4 | 3 | $1.31 \times 10^5$ | $4.65 \times 10^6$ | March 2014    | May 2014   |

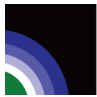

## 1. The Impacts of Climate Indices on Drought Propagation

The stepwise regression of drought propagation ratios to Phase Index (PI) and Climate Seasonality Index (CSI) are shown as the following figures. X1 refers to the detrended normalized Phase Index (PI), and X2 refers to the detrended normalized CSI.

PI and CSI are calculated as follows:

The monthly PET and monthly precipitation are fitted by sine curves as:

$$E_p(t) = \overline{E_p} \left[ 1 + \delta_E \sin \frac{2\pi(t - s_E)}{\tau} \right] \quad (S1)$$

$$P(t) = \overline{P} \left[ 1 + \delta_P \sin \frac{2\pi(t - s_P)}{\tau} \right] \quad (S2)$$

Then PI is calculated as:

$$PI = \delta_P \delta_E \cos \left( \frac{2\pi(s_P - s_E)}{\tau} \right) \quad (S3)$$

CSI is calculated as:

$$CSI = |\delta_P - \delta_E \Phi| \quad (S4)$$

where  $\Phi$  is the aridity index ( $\overline{E_p}/\overline{P}$ )

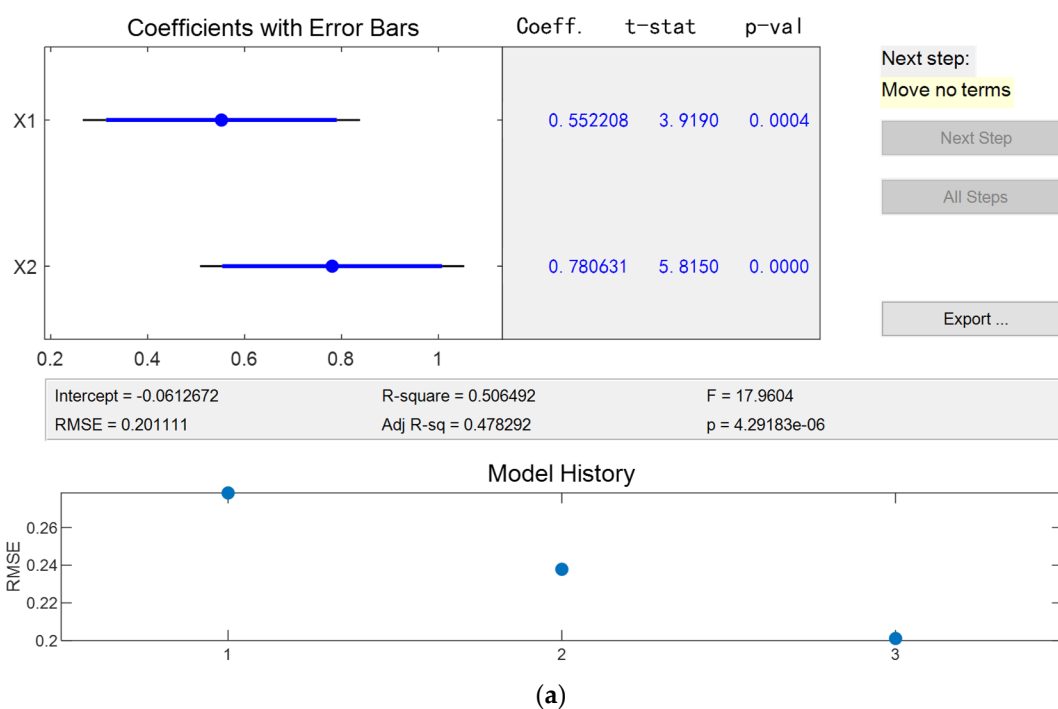

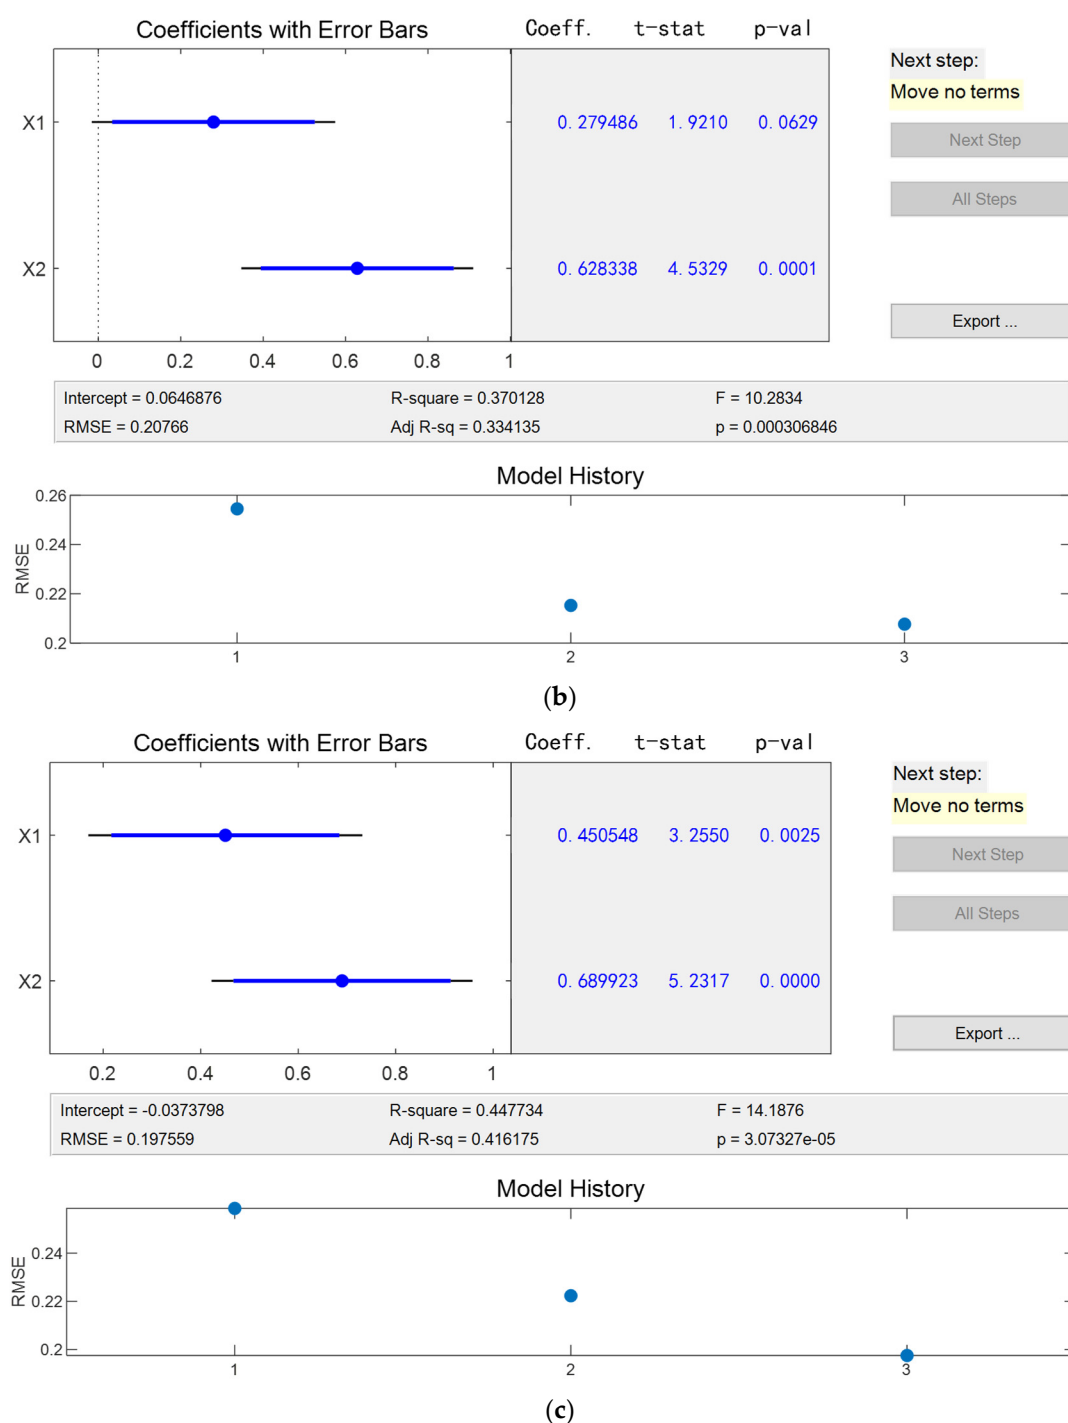

**Figure S1.** Regression results. (a) is the regression result of drought duration, (b) is the regression result of drought area, and (c) is the regression result of drought severity.

The stepwise regression is applied using Matlab R2018b. The threshold of p-value for accepting candidate variable is 0.05, and the threshold of p-value for rejecting accepted variable is 0.10.
